# Supplementary material for: Replication of Overall Survival, Progression-Free Survival, and Overall Response in Chemotherapy Arms of Non–Small Cell Lung Cancer Trials Using Real-World Data
Source: Oxford University Press journal article supplement (doi:10.1158/1078-0432.ccr-22-0471), 2022-05-05
Supplement: ccr-22-0471_supplementary_figure_s1_supps1.docx [file ccr-22-0471_supplementary_figure_s1_supps1.docx]

**Supplementary Figure S1. Cohort Attrition to Derive RCT-Like Populations Using RWD to Emulate Each IMpower RCT Using Flatiron Enhanced Datamart and Clinico-genomic Database**.

**
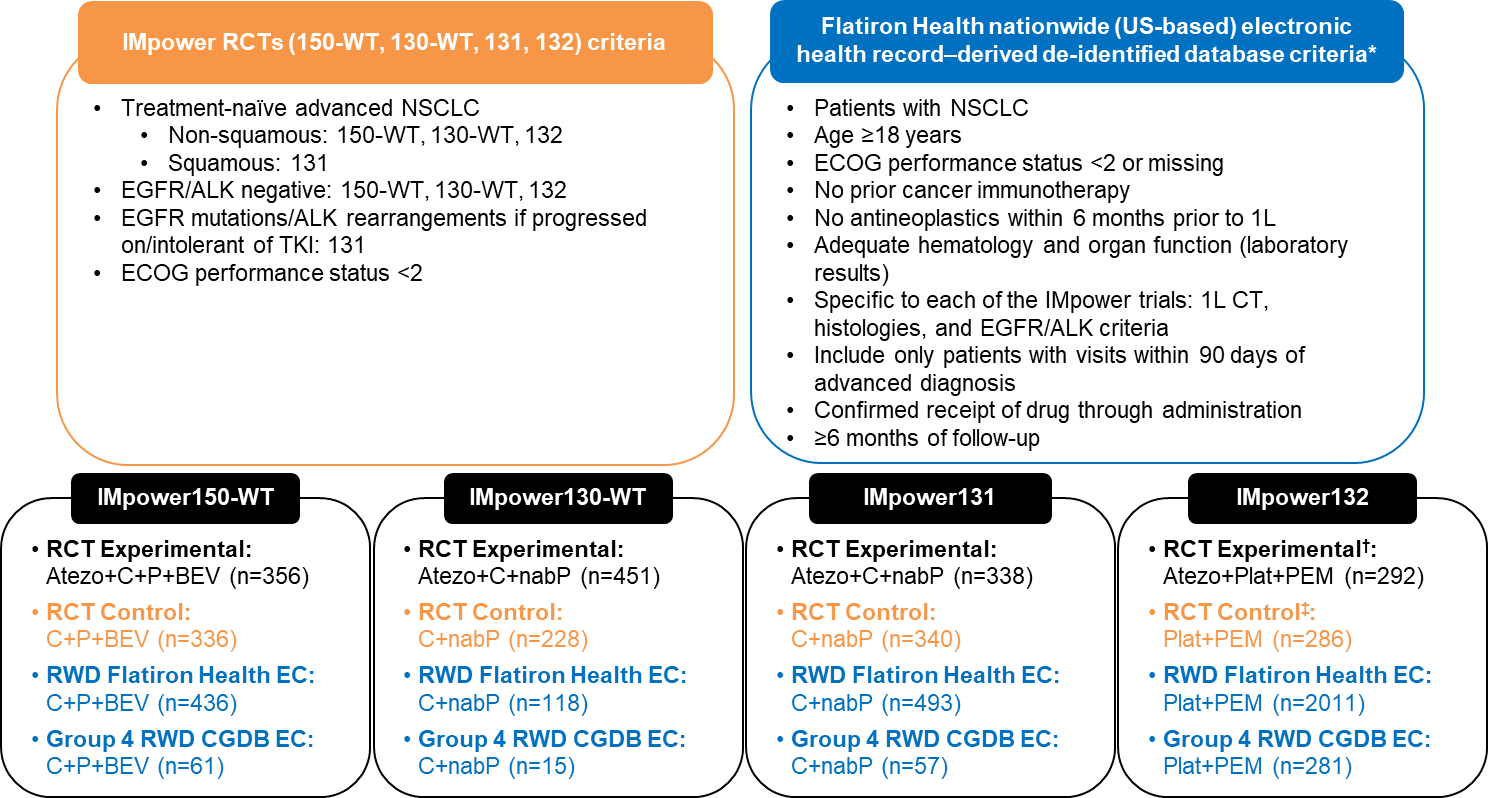
**

ALK, anaplastic lymphoma kinase; Atezo, atezolizumab; BEV, bevacizumab; C, carboplatin; CIT, cancer immunotherapy; CGDB, clinico-genomic database; CT, chemotherapy; EC, external control; ECOG, Eastern Cooperative Oncology Group; EGFR, epidermal growth factor receptor; nabP, nab-paclitaxel; NSCLC, non-small cell lung cancer; P, paclitaxel; PEM, pemetrexed; PFS, progression-free survival; Plat, carboplatin/cisplatin; RCT, randomized controlled trial; RWD, real-world data; TKI, tyrosine kinase inhibitor; WT, wild type. * Due to limited data availability in RWD, not all inclusion and exclusion criteria were applied. Concomitant illness and co-medication are among the important inclusion and exclusion criteria that were not applied.† WT intent-to-treat population.
