# Supplementary material for: Replication of Overall Survival, Progression-Free Survival, and Overall Response in Chemotherapy Arms of Non–Small Cell Lung Cancer Trials Using Real-World Data
Source: Oxford University Press journal article supplement (doi:10.1158/1078-0432.ccr-22-0471), 2022-05-05
Supplement: ccr-22-0471_supplementary_figure_s2_supps2.docx [file ccr-22-0471_supplementary_figure_s2_supps2.docx]

**Supplementary Figure S2. Distribution of Response Categories Between RCTs and RWD.** Response category distributions comparing RCT vs RWD in the (A) IMpower150-WT, (B) IMpower130-WT, (C) IMpower131, and (D) IMpower132 RCTs.

**
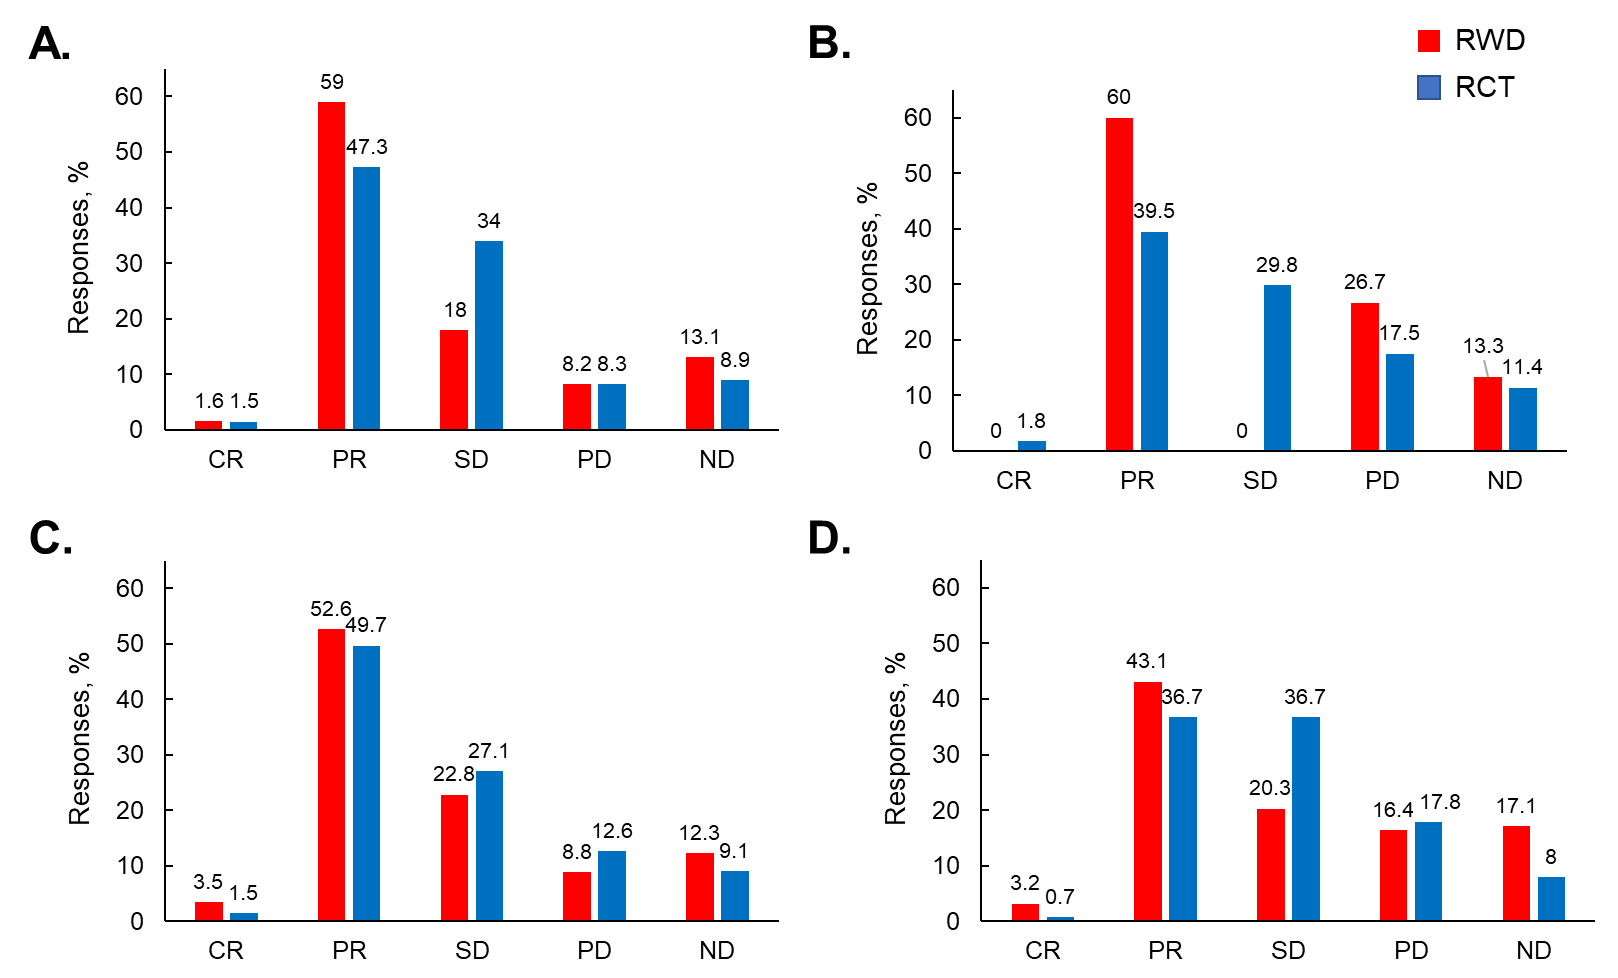
**

CR, complete response; ND, not determined; PD, progressive disease; PR, partial response; RCT, randomized controlled trial; RWD, real-world data; SD, stable disease; WT, wild type.
