# Supplementary material for: Replication of Overall Survival, Progression-Free Survival, and Overall Response in Chemotherapy Arms of Non–Small Cell Lung Cancer Trials Using Real-World Data
Source: Oxford University Press journal article supplement (doi:10.1158/1078-0432.ccr-22-0471), 2022-05-05
Supplement: ccr-22-0471_supplementary_table_1_suppts1.docx [file ccr-22-0471_supplementary_table_1_suppts1.docx]

**Supplementary Table S1. Criteria Groups for Incrementally Restrictive RCT-Like RWD Populations.**

| **Restriction criteria group**  **rules** | **IMpower150-WT**  **n=163** | **IMpower130-WT**  **n=187** | **IMpower131**  **n=187** | **IMpower132**  **n=672** |
| --- | --- | --- | --- | --- |
| **Chemotherapy regimen** | Carboplatin, bevacizumab, paclitaxel | Carboplatin, nab-paclitaxel | Carboplatin, nab-paclitaxel | Platinum, pemetrexed |
| **Group 1, n**   - Includes patients with advanced disease - Histology | 152 | 48 | 121 | 630 |
| **Group 2, n**   - Restriction criteria group 1+ - Age ≥18 years - Excludes prior anti-neoplastic and experimental drugs - Excludes patients without a visit within 90 days - Includes confirmation by administration | 128 | 41 | 117 | 576 |
| **Group 3, n**   - Restriction criteria group 1-2 + - Includes patients with ECOG PS <2 or missing - Includes only patients with normal lab values | 95 | 21 | 88 | 353 |
| **Group 4, n**   - Restriction criteria group 1-3 + - Study period restriction - Start of first line therapy ≥6 months before study end date - Excludes EGFR/ALK+ patients | 61 | 15 | 57 | 281 |

ECOG PS, Eastern Cooperative Oncology Group performance status; EGFR/ALK, epidermal growth factor receptor/anaplastic lymphoma kinase; RCT, randomized controlled trial; RWD, real-world data; WT, wild type.
