# Supplementary material for: Replication of Overall Survival, Progression-Free Survival, and Overall Response in Chemotherapy Arms of Non–Small Cell Lung Cancer Trials Using Real-World Data
Source: Oxford University Press journal article supplement (doi:10.1158/1078-0432.ccr-22-0471), 2022-05-05
Supplement: ccr-22-0471_supplementary_table_3_suppts3.docx [file ccr-22-0471_supplementary_table_3_suppts3.docx]

**Supplementary Table S3. Crude and Adjusted Real-World Response Rates RWD External Controls Selected using Restriction Criteria Group 4 to Replicate Trial Control ORR*.**

| **Categories** | **IMpower150-WT**  **n=61** | **IMpower130-WT**  **n=15** | **IMpower131**  **n=57** | **IMpower132**  **n=281** |
| --- | --- | --- | --- | --- |
| **RCT ORR**  **(95% CI)** | 48.8%  (43.4%, 54.3%) | 41.2%  (34.8%, 47.9%) | 51.2%  (45.7%, 56.6%) | 37.4%  (31.8%, 43.3%) |
| **Missing response** | 8 | 2 | 5 | 42 |
| **Responders** | 37 | 9 | 32 | 130 |
| **Unweighted rwRR (95% CI)** | 60.7%  (47.3%, 72.9%) | 60.0%  (32.3%, 83.7%) | 56.1%  (42.4%, 69.3%) | 46.3%  (40.3%, 52.3%) |
| **Weighted rwRR (95% CI)** | 51.6%  (31.5%, 71.2%) | Not estimated | 55.2%  (37.3%, 71.8%) | 44.8%  (37.7%, 52.1%) |

CI, confidence interval; ORR, overall response rate; RCT, randomized clinical trial; RWD, real-world data; rwRR, real-world response rate; WT, wild type. * Patients with missing or indeterminate response outcomes were included in the denominator.
